# Supplementary material for: Radiation fog properties in two consecutive events under polluted and clean conditions in the Yangtze River Delta, China: a simulation study
Source: Copernicus journal article supplement (doi:10.5194/acp-23-9873-2023), 2023-09-06
Supplement: Supplementary file 1 [file acp-23-9873-2023-supplement.pdf]

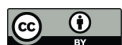

*Supplement of*

## **Radiation fog properties in two consecutive events under polluted and clean conditions in the Yangtze River Delta, China: a simulation study**

**Naifu Shao et al.**

*Correspondence to:* Chunsong Lu (luchunsong110@gmail.com)

The copyright of individual parts of the supplement might differ from the article licence.

The root-mean-square error (RMSE), mean bias (MB), the normalized mean bias (NMB), normalized mean error (NME), mean fractional bias (MFB), and mean fractional error (MFE) are calculated as follows (Eq. S1-S6):

$$\text{RMSE} = \sqrt{\frac{\sum_{i=1}^n (M_i - O_i)^2}{n}} \quad (\text{S1})$$

$$\text{MB} = \frac{1}{n} \sum_{i=1}^n (M_i - O_i) \quad (\text{S2})$$

$$\text{NMB} = \frac{\sum_{i=1}^n (M_i - O_i)}{\sum_{i=1}^n O_i} \quad (\text{S3})$$

$$\text{NME} = \frac{\sum_{i=1}^n |M_i - O_i|}{\sum_{i=1}^n O_i} \quad (\text{S4})$$

$$\text{MFB} = \frac{1}{n} \sum_{i=1}^n \frac{(M_i - O_i)}{(O_i + M_i / 2)} \quad (\text{S5})$$

$$\text{MFE} = \frac{1}{n} \sum_{i=1}^n \frac{|M_i - O_i|}{(O_i + M_i / 2)} \quad (\text{S6})$$

where  $M$  and  $O$  represent the results from simulation and observation;  $n$  is the total number of observation stations.

The following equations S7-S10 are the calculations about contributions to turbulent kinetic energy (TKE) including wind shear ( $TKE_{\text{shear}}$ ), buoyancy ( $TKE_{\text{buoy}}$ ), dissipation ( $TKE_{\text{diss}}$ ), and vertical mixing ( $TKE_{\text{mixing}}$ ).

$$TKE_{\text{shear}} = -\overline{u'w'} \frac{\partial u}{\partial z} - \overline{v'w'} \frac{\partial v}{\partial z} \quad (\text{S7})$$

$$TKE_{\text{buoy}} = \frac{g}{\theta} \overline{\theta'_v w'} \quad (\text{S8})$$

$$TKE_{\text{diss}} = \frac{q^3}{B_1 L} \quad (\text{S9})$$

$$TKE_{\text{mixing}} = -\frac{1}{2} \frac{\partial}{\partial z} \overline{q'w'} \quad (\text{S10})$$

where  $\overline{u'w'}$  and  $\overline{v'w'}$  are the Reynolds stress of the turbulent zonal pulsation  $u'$  and meridional pulsation  $v'$  in the vertical direction respectively,  $u$  and  $v$  are the zonal and meridional components of the horizontal wind,  $g$  is the acceleration of gravity,  $\theta$  is potential temperature,  $\overline{\theta'_v w'}$  is virtual potential temperature turbulent flux,  $q$  is the

dynamic physical quantity (e.g.  $u$  and  $v$ ) or thermal quantity (e.g.  $\theta$ ),  $\overline{\phi'w'}$  is the turbulent flux of dynamic or thermal quantity,  $q$  is related with TKE and its calculation is  $q = \sqrt{2TKE}$ ,  $B_1$  is closing constant,  $L$  is the master length scale,  $z$  is the height above ground.

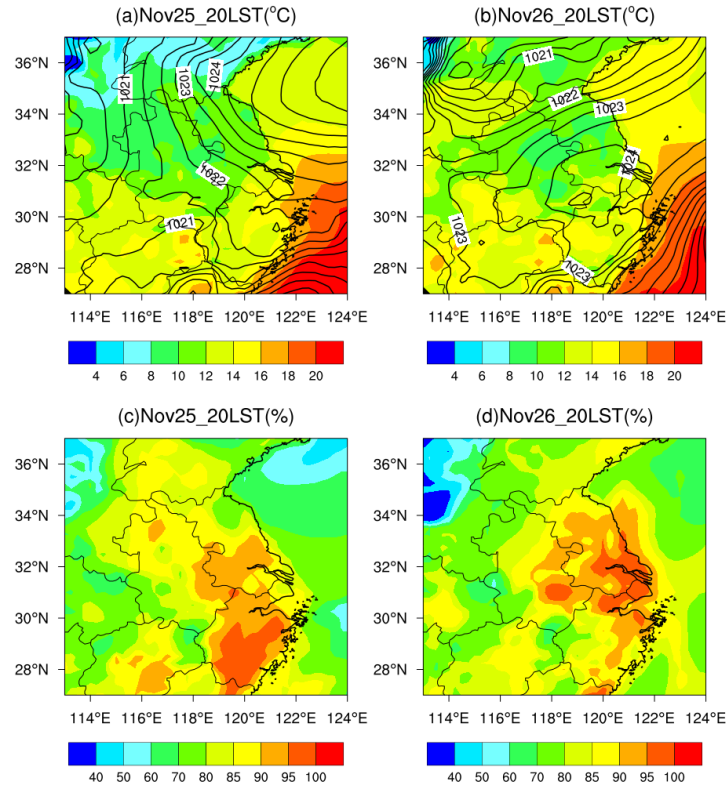

**Figure S1.** Surface weather map at 20:00 local standard time (LST = Universal Time Coordinated + 8 h) on 25 and 26 November 2018. (a-b) the shaded color is 2 m temperature (°C), the contour line is surface pressure (hPa), (c-d) the 2 m relative humidity (%). The time "Nov25\_20LST" means 20:00 LST on 25 November 2018. The other time expressions follow the same notation.

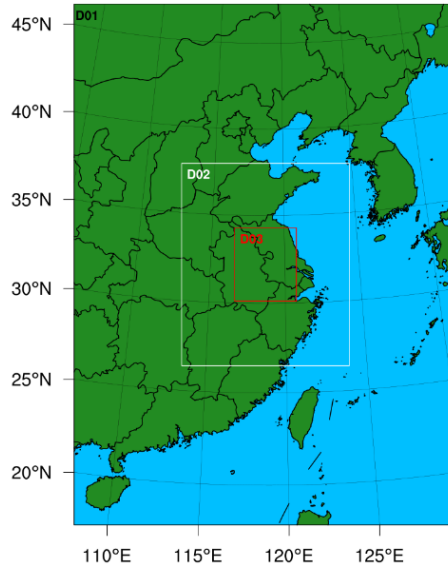

**Figure S2.** The model domain configuration with 3 nested domains and D01-D03 stand for domain 01-03, respectively.

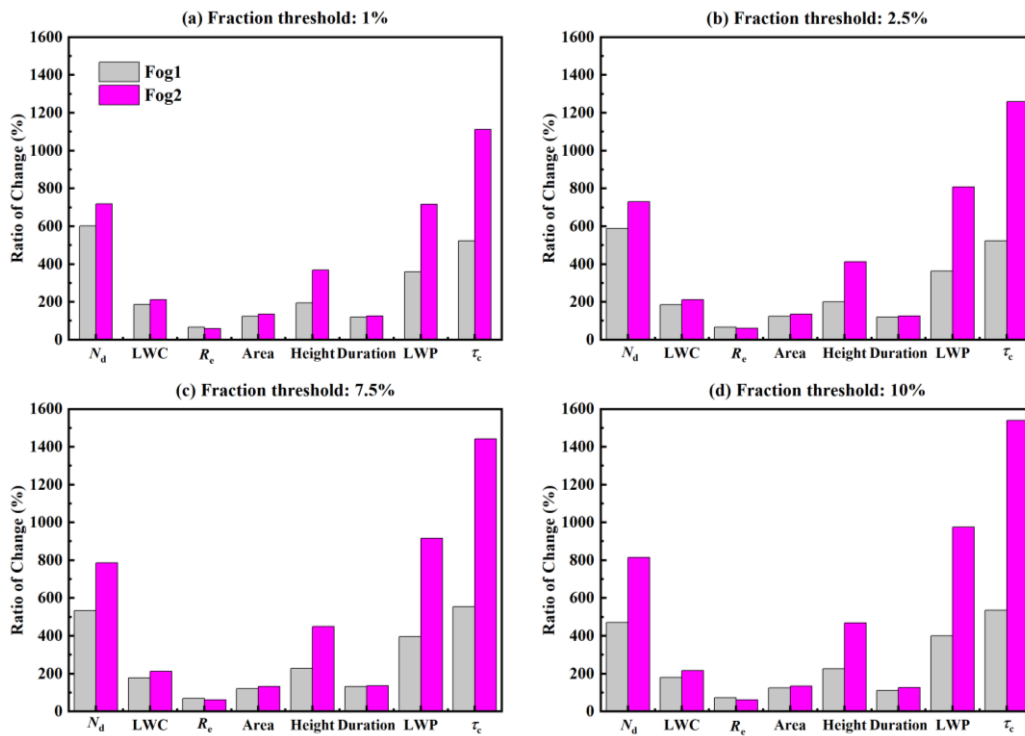

**Figure S3.** Aerosol effect on relative changes in macro- and microphysical properties during the first fog (Fog1) and the second fog (Fog2). Figure S3 a–d are the results with fog fraction area thresholds 1%, 2.5%, 7.5%, and 10% respectively.  $N_d$ , LWC,  $R_e$ , Area, Height, Duration, LWP, and  $\tau_c$  indicate fog number droplet concentration, liquid water content, effective radius, fog area fraction, fog-top height, liquid water path, and fog optical depth, respectively. The ratio of changes is calculated as Polluted/Clean.

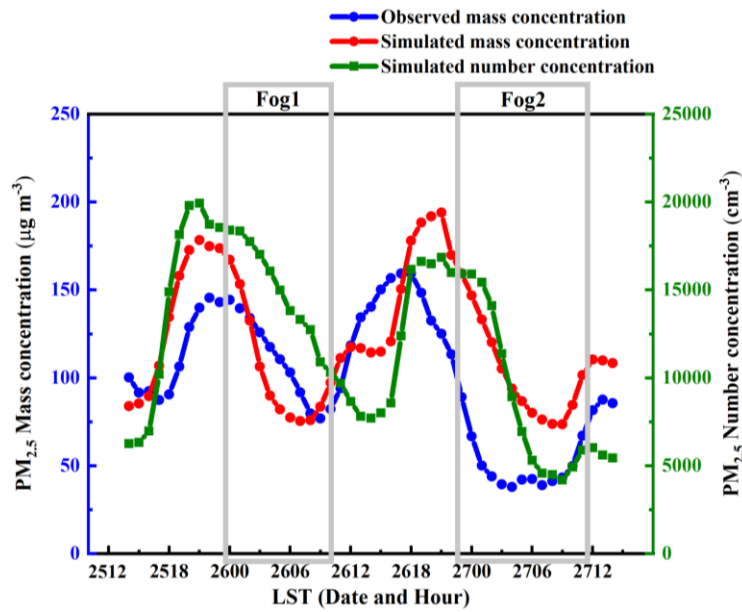

**Figure S4.** The timeseries of  $PM_{2.5}$  mass concentration and aerosol number concentration in Nanjing (the blue line: observed  $PM_{2.5}$  mass concentration, the red line: simulated  $PM_{2.5}$  mass concentration and the green line: simulated  $PM_{2.5}$  number concentration). Fog1 and Fog2 in the light grey box are the two fog events. Time ‘2512’ indicates 12:00 local standard time (LST) (LST = Universal Time Coordinated + 8 h) on 25 November 2018. The other time expressions follow the same notation.

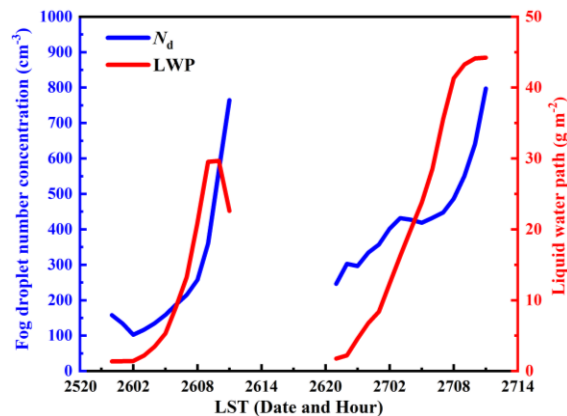

**Figure S5.** The timeseries of average liquid water path (LWP) in domain 03 under polluted and clean conditions (the red line: polluted conditions, the blue line: clean conditions). Time ‘2520’ indicates 20:00 local standard time (LST) (LST = Universal Time Coordinated + 8 h) on 25 November 2018. The other time expressions follow the same notation.
